# Supplementary material for: ABCDEF Bundle and Supportive ICU Practices for Patients With Coronavirus Disease 2019 Infection: An International Point Prevalence Study
Source: PubMed Central journal article supplement — Crit Care Explor. 2021 Mar 12;3(3):e0353. doi: 10.1097/CCE.0000000000000353 (PMC7994035; doi:10.1097/cce.0000000000000353), 2021-03-12
Supplement: cc9-3-e0353-s001.pdf [file cc9-3-e0353-s001.pdf]

Appendix: List of Collaborators and Investigators in ISIIC study

**NATIONAL SOCIETIES / NETWORKS ENDORSING THE STUDY:**

European Society of Intensive Care Medicine (ESICM): President of the European Society of Intensive Care Medicine, Professor Jozef Kesecioglu; World Federation of Intensive and Critical Care (WFICC): President of the World Federation of Intensive and Critical Care, Professor Janice Zimmerman; Indian Society of Critical Care Medicine (ISCCM): President of the Indian Society of Critical Care Medicine, Dr. Dhruva Chaudhry; ICU Recovery Network; the Covid-19 Critical Care Consortium (CCCC); Japanese Society of Early Mobilization; Japanese Society of Education for Physicians and Trainees in Intensive Care (JSEPTIC); Infectious Diseases Association for Teaching and Education in Nippon (IDATEN); Emergency Medicine Alliance (EMA);

Social Networking Service: Facebook, Twitter

Web-site (<https://form.jsea2005.org/isiic-study/>)

**STUDY COORDINATION:** Utako Nakayasu (Japanese Society of Intensive Care Medicine, Japan)

**DATA REVISION AND MANAGEMENT:** Tomohiro Sonoo (Hitachi General Hospital, Hitachi, Ibaraki), (TXP Medical Co. Ltd., Tokyo), Takumi Ochiai (TXP Medical Co. Ltd., Tokyo)

**Site Investigators by country:**

**ANDORRA:** Hospital Nostra Senyora de Meritxell: Antoni Margarit Ribas

**ARGENTINA:** Hospital Lagomaggiore: Graciela Zakalik, Hospital J.C.Perrando: Nelson C.A.Sanchez, Hospital Italiano de Buenos Aires: Federico Carini,

**AUSTRALIA:** Monash University: Carol Hodgson,

**BANGLADESH:** Evercare Hospital Dhaka: Zafor Iqbal,

**BELGIUM:** UZ Leuven campus Gasthuisberg: Rik Gosselink,

**BOLIVARIAN REPUBLIC OF VENEZUELA:** Hospita "Miguel Pérez Carreño"IVSS.  
Caracas: Ingrid von der Osten,

**BRAZIL:** Hospital Municipal de Salvador: Jose Mario Meira Teles, Hospital Geral de Fortaleza: Carlos Augusto Ramos Feijo, Hospital Geral Cleriston Andrade: (no name available), Hospital Prontobaby: Roberta Esteves Vieira de Castro, Hospital Teresa de Lisieux: Albert Bacelar, Hospital municipal Ruth cardoso: Pedro Salomão Dias, Hospital e Maternidade São Cristóvão: José Roberto Aldrighi, Itaipara Memorial Gastro Hepato Endoscopia: (no name available), Hospital do Subúrbio: (no name available), Departamento de Enfermagem Médico-Cirúrgica: Paula Cristina Nogueira,

**COLUMBIA:** Gestion Salud: Carmelo Dueñas,

**EGYPT:** KSH: Osama sobh, Minia University Hospital: Yasmin K. NasrEldin, Assiut University Hospitals: Islam Ali Ahmed, Mahmoud M. Saad, Aliae Hussein,

**EL SALVADOR:** General Hospital: Carlos E. Orellana-Jimenez,

**FRANCE:** Hôpital Nord Franche-Comté: Fernando Daniel Berdaguer Ferrari, GH Sud Ile-de-France Melun: Sebastien Jochmans,

**GERMANY:** UKSH: Peter Nydahl,

**GREECE:** University Hospital of Ioannina: Georgios Papathanakos, General Hospital of Athens "Evaggelismos": Irini Patsaki, Saint Paul ("Agios Pavlos") General Hospital, Theodoros Aslanidis

**GUATEMALA:** Hospital Roosevelt: Zonia Guzman,

**INDIA:** Sanjay Gandhi Postgraduate Institute of Medical Sciences: Mohan Gurjar, Royalcare Superspeciality Hospital: Lakshmikanthcharan S, Sir Gangaram Hospital: Niraj Tyagi, Vijaya Hospital: (no name available), Aware Gleneagles global hospitals L.B Nagar: (no name available), Christian Medical College & Hospital: Madhu Ashok Kumar. D, Apollo Hospital: subbareddy, GBH cancer Hospital Udaipur: Virendra Kumar Goyal, Columbia Asia hospital white field Bangalore: (no name available), AIIMS Patna: Divendu Bhushan, Narayana Superspeciality hospital: (no name available), Seth Nandlal Dhoot Hospital: (no name available), Metro Multispeciality Hospital: Kapil Singhal, Cancer Institute (WIA): Radhika Dash, Nh Narayana Superspeciality Hospital Guwahati: (no name available), Tagore Hospitel Jalandhr India: Ziyokov Joshi, Gokul

Superspeciality Hospital: Tejas Karmata, Jawahar Lal Nehru Medical College: Abu Nadeem, AIIMS Rishikesh: Nidhi Gupta, D Y Patil Hospital And Research Centre: Unnati Pandit, BYL Nair charitable hospital and TN medical College Mumbai: Swati Chhatrapati, Lipika Baliarsing, Charulata Deshpande, Indu.S,

**INDONESIA:** RSUP Prof.Dr.R.D. Kandou Manado: Eka Yudha Lantang,

**IRAN:** Shahid Rajae hospital: Mansoor Masjedi, Imam Reza: Ata Mahmoodpoor,

**IRAQ:** Baghdad teaching hospital: Abdullah Khudhur Ahmed,

**IRELAND:** Cork University Hospital: Ahmed Elsaka, Ivan Hayes, Our Lady of Lourdes hospital: Tharwat Aisa,

**ITALY:** Ospedale Sant'Andrea - Sapienza University: monica rocco, Ospedale Magalini Villafanca - Aulss9 Scaligera: Plinio Calligaro,

**JAPAN:** Saiseikai Utsunomiya Hospital: Takayuki Ogura, The University of Tokyo

Hospital: Hikoro Matsui, Kobari General Hospital: Masayuki Oshima, Kimitsu Chuo  
Hospital: Nobuya Kitamura, Kobe University Hospital: Moritoki Egi, Kyorin University  
Hospital: Kiyoshi Moriyama, Yoshihiro Yamaguchi, Nagasaki University Hospital:  
Tetsuya Hara, Kochi Medical School Hospital: Yoshifumi Katsumata, Kagoshima City  
Hospital: Masataka Nakamura, Higashiosaka City Medical Center: Hodaka Kumano,  
Kariya Toyota General Hospital: Masanao Miura, Aichi Medical University Hospital:  
Naoshi Takeyama, Shizuoka General Hospital: Keisuke Ohta, Jichi Medical University  
Hospital: Shin Nunomiya, Kawasaki Medical School General Medical Center: Hiroshi  
Katayama, Eastern Chiba Medical Center: Eizo Watanabe, Saku Central Hospital  
Advanced Care Center: Kunihiko Okada, Wakayama Medical University Hospital:  
Kyohei Miyamoto, University of the Ryukyus hospital: Tatsuya Fuchigami, National  
Center for Global Health and Medicine: Tatsuya Okamoto, Japanese Red Cross Maebashi  
Hospital: Hiroyuki Suzuki, Sendai Kousei Hospital: Jun Ito, Yamaguchi University  
Hospital: Mishiya Matsumoto, Gifu University Hospital: Takahito Miyake, Chiba  
Emergency Medical Center: Noriyuki Hanaoka, Shizuoka Children's Hospital: Masaki  
Osaki, Tatsuya Kawasaki, Ageo Central General Hospital: Kanbe Fumiko, Hokkaido  
University Hospital: Hitoshi Saito, Gunma University Hospital: Masafumi Kanamoto,  
Shinonoi General Hospital: So Oishi, Fukui Prefectural Hospital: Minoru Hayashi,

Japanese Red Cross Kyoto Daiichi Hospital: Masahito Horiguchi, Tokyo medical university hospital: Koichi Nakazawa, Tokyo Medical University Ibaraki Medical Center: Yuko Kuroda, Toyooka Public Hospital: Makoto Kobayashi, Kyoto Medical Center: Satoru Beppu, Teine Keijinaki hospital: Takako Akimoto, Kagawa University Hospital: Tomonori Sugawara, Hyogo Prefectural Kobe Children's Hospital: Hiroshi Kurosawa, Sendai City Hospital: Kohkiti Andoh, Subaru Health Insurance Society Ota Memorial Hospital: Takeshi Nara, Nanbu Medical Center / Nanbu Child Medical Center: Takehiro Umemura, Chiba University Hospital: Ryuzo Abe, Sapporo Medical University Hospital: Yoshiki Masuda, Seirei Hamamatsu General Hospital: Takahiro Atsumi, Shinshu University Hospital: Sari Shimizu, Saiseikai Fukuoka General Hospital: Hirofumi Norio, Nagano Children's Hospital: Masatomo Kitamura, Saiseikai Kumamoto Hospital: Tadashi Sawamura, Juntendo University Hospital: Chieko Mitaka, Akita City Hospital, Souhaku Shigeomi, Kumamoto University Hospital: Tatsuo Yamamoto, Osaka Red Cross Hospital: Kenichiro Nishi, Japanese Red Cross Saitama Hospital: Kazuya Kiyota, Asahikawa Medical University Hospital: Naohiro Kokita, Osaka Mishima Emergency Critical Care Center: Hitoshi Kobata, Kagawa Prefectural Central Hospital: Akihito Hirasaki, National Hospital Organization Kumamoto Medical Center: Toshihiro Sakurai, Hiroshima City Hiroshima Citizens Hospital: Makoto Takatori, Okinawa Kyodo

Hospital: Yutaka Sakuda, Chubu Tokushukai Hospital: Hiroshi Iha, Saitama Medical Center: Koyama Kaoru, Saitama Medical University International Medical Center: Futoshi Kotajima, Saiseikai Senri Hospital: Hirotaka Sawano, Osaka Medical College Hospital: Osamu Umegaki, Okayama University Hospital: Hiromichi Naito, Jichi Children's Medical Center Tochigi: Naoyuki Taga, Tokushima Prefectural Central Hospital: Emiko Nakataki, Fukui Cardiovascular Center: Ikuo Moriuchi, National Hospital Organization Hokkaido Medical Center: Yasuo Shichinohe, Steel Memorial Hirohata Hospital: Sinkichi Hatanaka, Yamaguchi Grand Medical Center: Hideo Oka, Asahi General Hospital: Kyoji Oe, Narita Red Cross Hospital: Yoshihisa Tateishi, Osaka University Hospital: Junya Shimazaki, Kyoto University Hospital: Shinichi Kai, Shinshu University: Kenichi Nitta, Yokohama Municipal Citizen's Hospital: Hajime Hayami, Mitsui Memorial Hospital: Katsuyuki Terajima, National Hospital Organization Shizuoka Medical Center: Akiko Ozawa, Japanese Red Cross Kyoto Daini Hospital: Hiromichi Narumiya, Nara Medical University: Satoki Inoue, Kansai Electric Power Hospital: Takuya Hashino, Kanazawa University Hospital: Masaki Okajima, Osaka General Medical Center: Takeshi Nishida, Yodogawa Christian Hospital: Noboru Kato, Hyogo Prefectural Kakogawa Medical Center: Hiroaki Shimizu, Showa University Hospital: Kazuki Kikuyama, Japanese Red Cross Nagoya Daini Hospital: Hiroe Takasu,



Takarazuka City Hospital: Hideaki Imanaka, Osaka City General Hospital: Kazuaki Shigemitsu, Yokosuka Kyosai Hospital: Usuda Yutaka, University of Miyazaki Hospital: Masahiko Taniguchi, Jikei University Katsushika medical Hospital: Toko Fukushima, Nippon Medical School Tama Nagayama Hospital: Masamune Kuno, Fujisawa City Hospital: Osamu Akasaka, International University of Health and Welfare Atami Hospital: Masao Nagayama, Urasoe general hospital: Munekatsu Miyahira, Keio University Hospital: Kentaro Tomita, Sapporo City General Hospital: Masahiro Takahashi, Hyogo Brain & Heart Center at Himeji: Yasuyo Taniguchi, Saiseikai Kawaguchi General Hospital: Yuya Miyazaki, The University of Tokyo Hospital: Naoki Hayase, National Hospital Organization Tokyo Medical Center: Hatakeyama Junji, Fukuoka University Hospital: Kota Hoshino, St. Marianna university hospital: Yasunobu Tsuda, The University of Tokai Hachioji Hospital: Yuuki Ozaki, Fujita Health University Hospital: Naohide Kuriyama, Tokyo Metropolitan Tama Medical Center: Jun Hamaguchi, Yokohama City Minato Red Cross Hospital: Isao Nagata, Osaka Habikino Medical Center: Yozo Kashiwa, Tokyo Medical and Dental University Hospital of Medicine: Akira Endo, Keio University Hospital: Hiromasa Nagata, Kobe City Medical Center General Hospital: Ryutaro Seo, Sakakibara Heart Institute: Go Haraguchi,

**JORDAN:** King Abdullah University Hospital: Ala' Mamduh Matroud Assmairan,

**KOREA:** Inha University Hospital: Jung Soo Kim, Yeungnam University Hospital: S. B.

Lee, Daedong Hospital: Ju-Yeon Park, Eunpyng St Mary's Hospital: DS Yoo, Samsung

Medical Center: Chi Ryang Chung, Eunpyeong St. Mary's Hospital: Sei Won Kim, Seoul

National University Hospital: Sang-Min LEE,

**LEBANESE REPUBLIC:** UMC - RIZK Hospital: Fayez François Abillama,

**LIBYA:** Tripoli Central Hospital: Eman Ali Mohamed Abdulwahed, Aljalla Benghazi

Center: Ahmad Buimsaedah, Medical Care Clinic: Elham Bareig, Maetiqa hospital:

Zaynab Amir Alziyutuni, Metiega Hospital: Bushray Alhadi Almiqlash, Sabratha

Teaching Hospital: Asma Abubakr Saleh Alkamkhe, Al\_Jomhorya Hospital: Mohammed

Fadhlullah Mohammed Rajab Mohammed,

**LITHUANIA:** Vilnius University, Santaros Klinikos hospital: Marius Miglinas,

**MEXICO:** Hospital Angeles del Carmen: Angel Carlos Bassols, Unidad Médica de Alta

Especialidad No. 25 Centro Médico Nacional Noreste IMSS: José Carlos Hernandez Pedroza, Sanatorio San José: Jefa uti, Pasteur Hospital - Español Hospita: (no name available),

**NEPAL:** Nepal Mediciti Hospital: Rashmi Suvedi,

**NETHERLAND:** Gelre Hospitals: M. Flim, Franciscus Gasthuis en Vlietland: Victor van Bochove,

**NIGERIA:** Muhammadu Buhari Specialist Hospital: Sani Adamu, Atbuth Bauchi: Musa Abubakar Madaki,

**NORWAY:** Stavanger University Hospital: Unni Syre,

**PHILIPPINES:** The Medical City, Philippines: Katherine G. Chan, Jude Erric L. Cinco , Asian Hospital and Medical Center: Joanne Robles, Our Lady of Lourdes hospital: Tharwat Aisa, VRP Medical Center: Celso F Bate, Lung Center of the Philippines: Norberto A. Francisco,

**PORTUGAL:** Centro Hospitalar Vila Nova de Gaia/Espinho: Ana Lúcia Rios Pinto, IPO  
porto: Brigitte Pereira, Centro Hospitalar Universitário São João: Isabel Coimbra,

**QATAR:** Hamad General Hospital: Ahmed Subhy Alsheikhly,

**REPUBLIC OF RUWANDA:** University Teaching Hospital of Butare (CHUB):  
Theogene Twagirimugabe,

**RUSSIA:** National Medical Research Center for Obstetrics, Gynecology and  
Perinatology Named After Academician V.I.Kulakov: Alexey Pyregov, Privolzhskiy  
District Medical Center: Vladislav Belskii,

**SAUDI ARABIA:** Prince Sultan Military Medical City: Ghaleb Almekhlafi, Prince  
Sultan armed force hospital: (no name available), Almana General Hospital: Haithum Ali,  
King Khalid hospital Najran: Abduelbagi Dafaallah Aldesogi Altayb, King Salman  
Military Hospital: Azza Abdelmoneim Elsayed Elmandouh,

**SINGAPORE:** National University Hospital: Diana Sani, Khoo Teck Puat Hospital:

Sunny Tan,

**SPAIN:** Hospital Universitario de Getafe: Fernando Frutos-Vivar, Hospital Verge de la

Cinta de Tortosa: Ferran Roche-Campo, Hospital Verge de la Cinta: Pablo Concha

Martínez, Rio Hortega: Ana Prieto de Lamo, CAULE: Sergio Marcos Contreras, Hospital

Clínic Universitari de Valencia: Rafael Badenes, Hospital Clinico Universitario Lozano

Blesa: Sandra Herrero García, Centro de Investigación Biomedica en Red de

Enfermedades Respiratorias (CIBERES): Jordi Rello, Hospital Francesc de Borja Gandia:

Susana Isabel Gil Garcia,

**SUDAN:** Universal Hospital: Khabab Abbasher Hussien Mohamed Ahmed,

**SWEDEN:** Östra/Sahlgrenska universitets sjukhuset: (no name available),

**SWITZERLAND:** Stadtspital Waid und Triemli: Patricia Fodor, Hospital Bülach: Bernd

Yuen, Hirslanden Clinique Cecil: Isabelle Fleisch, Spital Limmattal Schlieren: Daniel

Wyder, Geneva University Hospitals: Filippo Boroli,

**THAILAND:** Siriraj Hospital: Panuwat Promsin,

**TURKEY:** Bartın Government Hospital: Faruk Seckin Yucesoy, Kanuni Research and Training Hospital: Ahmet Eroglu, Düzce University, Faculty of Medicine: Türkay Akbaş,

**UNITED ARAB EMIRATES:** Al Kuwaiti Hospital: Dr. Sherif, Prime Hospital: Dirar Abdallah,

**UNITED KINGDOM:** Queen Elizabeth Hospital: Zahid Khan, Hospital Nacional Almanzor Aguinga Asenjo: Juan Luis Pinedo Portilla, Queen Elizabeth Queen Mother Hospital: Tarek Metwally, The Princess Alexandra Hospital NHS Trust: Henry Lee-Six, Newham University Hospital: (no name available), Blackpool Teaching Hospital NHS Foundation: Simon Hayward, Queen Elizabeth The Queen Mother Hospital: Tarek Elsefi, St Mary's Hospital: Alice Harrison,

**URUGUAY:** CASMU-IAMPP: (no name available)

**USA:** John Peter Smith Hospital: Daniel Ziegler, Interfaith Medical Centre: Ramakanth  
Goel Pata, MD Anderson Cancer Center: Isidro Prieto Del Portillo, Weill Cornell  
Medicine: Parimal Patel, Rush University medical center: Drayton Hammond,

**YEMEN:** Zayed Motherhood and Childhood Hospital: Rafat Ameen Mohammed Al-  
saban,
