# Supplementary material for: ABCDEF Bundle and Supportive ICU Practices for Patients With Coronavirus Disease 2019 Infection: An International Point Prevalence Study
Source: PubMed Central journal article supplement — Crit Care Explor. 2021 Mar 12;3(3):e0353. doi: 10.1097/CCE.0000000000000353 (PMC7994035; doi:10.1097/cce.0000000000000353), 2021-03-12
Supplement: cc9-3-e0353-s004.pdf [file cc9-3-e0353-s004.pdf]

Supplement to “ABCDEF Bundle and Supportive ICU Care Practices for patients with COVID-19: An international point prevalence study ~ISIIC Study~”

Keibun Liu, MD, PhD<sup>1</sup>; Kensuke Nakamura, MD, PhD<sup>2\*</sup>; Hajime Katsukawa, PT, PhD<sup>3</sup>; Muhammed Elhadi, MBBCh<sup>4</sup>; Peter Nydahl, RN, PhD<sup>5</sup>; Eugene Wesley Ely, MD<sup>6,7,8,9</sup>; Sapna R Kudchadkar, MD, PhD<sup>10</sup>; Kunihiro Takahashi, PhD<sup>11</sup>; Shigeaki Inoue, MD, PhD, MSCI<sup>12,13</sup>; Alan Kawarai Lefor, MD, MPH, PhD, FACS<sup>14</sup>; Jozef Kesecioglu, MD<sup>15,16</sup>; Osamu Nishida, MD, PhD<sup>17</sup>

<sup>1</sup> Critical Care Research Group, Faculty of Medicine, University of Queensland and The Prince Charles Hospital, Brisbane, Australia

<sup>2</sup> Department of Emergency and Critical Care Medicine, Hitachi General Hospital, Hitachi, Ibaraki, Japan

<sup>3</sup> Japanese Society for Early Mobilization, Tokyo, Japan

<sup>4</sup> Faculty of Medicine, University of Tripoli, Tripoli, Libya

<sup>5</sup> Nursing Research, Department of Anesthesiology and Intensive Care Medicine, University Hospital of Schleswig-Holstein, Kiel, Brunswiker Str. 10, 24105 Kiel, Germany. Orcid 0000-0002-5178-0364

<sup>6</sup> Critical Illness, Brain Dysfunction, and Survivorship (CIBS) Center, Vanderbilt University School of Medicine, Nashville, TN, USA.

<sup>7</sup> Department of Medicine, Division of Allergy, Pulmonary and Critical Care Medicine, Vanderbilt University School of Medicine, Nashville, TN, USA.

<sup>8</sup> Geriatric Research Education and Clinical Center (GRECC), Department of Veterans Affairs Medical Center, Tennessee Valley Healthcare System, Nashville, TN, USA.

<sup>9</sup> Center for Health Services Research, Vanderbilt University School of Medicine, Nashville, TN, USA.

<sup>10</sup> Physician, Department of Anesthesiology and Critical Care Medicine, Department of Physical Medicine and Rehabilitation, and Department of Pediatrics, Johns Hopkins University School of Medicine, Baltimore, MD,

<sup>11</sup> Department of Biostatistics, M&D Data Science Center, Tokyo Medical and Dental University, Tokyo, Japan

<sup>12</sup> Emergency and Critical Care Center, Kobe University Hospital, Kobe, Japan

<sup>13</sup> Department of Disaster and Emergency Medicine, Kobe University, Graduate School of Medicine, Kobe, Japan

<sup>14</sup> Department of Surgery, Jichi Medical University, Tochigi, Japan.

<sup>15</sup> Humanitas Research Hospital and Humanitas University, Milan, Italy.

<sup>16</sup> Department of Intensive Care Medicine, University Medical Center, Utrecht University, Utrecht, The Netherlands.

<sup>17</sup> Department of Anesthesiology and Critical Care Medicine, Fujita Health University School of Medicine, Toyoake, Japan.

## **Supplemental materials**

### **Supplemental Tables**

Supplemental Table 1: Reporting checklist for a cross-sectional study based on the STROBE cross sectional guidelines.

Supplemental Table 2: Operational definitions of evidence-based and supportive ICU care

Supplemental Table 3: Countries with participating sites

Supplemental Table 4: Basic information for hospitals with participating ICUs

Supplemental Table 5: ICU Visiting hours per day for family members before and after the COVID-19 pandemic

Supplemental Table 6: Details of Implementing the ABCDEF bundle

**Supplemental Table 7. Association Between the Presence of a Written Protocol and Implementation of the ABCDEF Bundle**

Supplemental Table 8: Association Between Multidisciplinary Rounds and Implementation of the ABCDEF Bundle

Supplemental Table 9: Association Between Nurse-to-Patient Ratio and Implementation of the ABCDEF Bundle

Supplemental Table 10: Association Between Number of ICU Beds Exclusively for COVID-19 Patients and Implementation of the ABCDEF Bundle

Supplemental Table 11: Association between ICU structure and implementation of elements E and F.

Supplemental Table 12: Comparison of the implementation of the ABCDE bundle in the present study with that prior to the COVID-19 pandemic.

**Appendix 1:** List of Collaborators and Investigators in ISIIC study

**Appendix 2:** Survey Reporting Forms: Survey of basic information of the hospital/ICU

**Appendix 3:** Survey Reporting Forms: Survey of daily ICU care

Supplemental Table 1. Reporting checklist for a cross-sectional study based on the STROBE cross sectional guidelines.

| List                       | Reporting Item                                                                                                                                                                                                                                                             | Page Number |
|----------------------------|----------------------------------------------------------------------------------------------------------------------------------------------------------------------------------------------------------------------------------------------------------------------------|-------------|
| <b>Title and abstract</b>  |                                                                                                                                                                                                                                                                            |             |
| Title                      | <u>#1a</u> Indicate the study's design with a commonly used term in the title or the abstract                                                                                                                                                                              | 1           |
| Abstract                   | <u>#1b</u> Provide in the abstract an informative and balanced summary of what was done and what was found                                                                                                                                                                 | 5           |
| <b>Introduction</b>        |                                                                                                                                                                                                                                                                            |             |
| Background / rationale     | <u>#2</u> Explain the scientific background and rationale for the investigation being reported                                                                                                                                                                             | 7           |
| Objectives                 | <u>#3</u> State specific objectives, including any prespecified hypotheses                                                                                                                                                                                                 | 8           |
| <b>Methods</b>             |                                                                                                                                                                                                                                                                            |             |
| Study design               | <u>#4</u> Present key elements of study design early in the paper                                                                                                                                                                                                          | 9           |
| Setting                    | <u>#5</u> Describe the setting, locations, and relevant dates, including periods of recruitment, exposure, follow-up, and data collection                                                                                                                                  | 9, 10       |
| Eligibility criteria       | <u>#6a</u> Give the eligibility criteria, and the sources and methods of selection of participants.                                                                                                                                                                        | 10          |
|                            | <u>#7</u> Clearly define all outcomes, exposures, predictors, potential confounders, and effect modifiers. Give diagnostic criteria, if applicable                                                                                                                         | 10-13       |
| Data sources / measurement | <u>#8</u> For each variable of interest give sources of data and details of methods of assessment (measurement). Describe comparability of assessment methods if there is more than one group. Give information separately for exposed and unexposed groups if applicable. | 11, 12      |
| Bias                       | <u>#9</u> Describe any efforts to address potential sources of bias                                                                                                                                                                                                        | n/a         |
| Study size                 | <u>#10</u> Explain how the study size was arrived at                                                                                                                                                                                                                       | n/a         |
| Quantitative               | <u>#11</u> Explain how quantitative variables were                                                                                                                                                                                                                         | 11, 12      |

|                     |             |                                                                                       |        |
|---------------------|-------------|---------------------------------------------------------------------------------------|--------|
| variables           |             | handled in the analyses. If applicable, describe which groupings were chosen, and why |        |
| Statistical methods | <u>#12a</u> | Describe all statistical methods, including those used to control for confounding     | 12, 13 |
| Statistical methods | <u>#12b</u> | Describe any methods used to examine subgroups and interactions                       | 12, 13 |
| Statistical methods | <u>#12c</u> | Explain how missing data were addressed                                               | 12     |
| Statistical methods | <u>#12d</u> | If applicable, describe analytical methods taking account of sampling strategy        | 11-13  |
| Statistical methods | <u>#12e</u> | Describe any sensitivity analyses                                                     | n/a    |

## Results

|                  |             |                                                                                                                                                                                                                                                                               |                                                       |
|------------------|-------------|-------------------------------------------------------------------------------------------------------------------------------------------------------------------------------------------------------------------------------------------------------------------------------|-------------------------------------------------------|
| Participants     | <u>#13a</u> | Report numbers of individuals at each stage of study—e.g., numbers potentially eligible, examined for eligibility, confirmed eligible, included in the study, completing follow-up, and analyzed. Give information separately for exposed and unexposed groups if applicable. | 14                                                    |
| Participants     | <u>#13b</u> | Give reasons for non-participation at each stage                                                                                                                                                                                                                              | Figure 1                                              |
| Participants     | <u>#13c</u> | Consider use of a flow diagram                                                                                                                                                                                                                                                | Figure 1                                              |
| Descriptive data | <u>#14a</u> | Give characteristics of study participants (e.g., demographic, clinical, social) and information on exposures and potential confounders. Give information separately for exposed and unexposed groups if applicable.                                                          | 14, 15<br>Table 1 and 2<br>Supplemental Table 4 and 5 |
| Descriptive data | <u>#14b</u> | Indicate number of participants with missing data for each variable of interest                                                                                                                                                                                               | n/a                                                   |
| Outcome data     | <u>#15</u>  | Report numbers of outcome events or summary measures. Give information separately for exposed and unexposed groups if applicable.                                                                                                                                             | 14, 15<br>Table 3                                     |
| Main results     | <u>#16a</u> | Give unadjusted estimates and, if applicable, confounder-adjusted estimates and their precision (e.g., 95% confidence interval). Make clear which confounders were adjusted for and why they were included                                                                    | 15, 16<br>Table 3                                     |

|                |             |                                                                                                              |                     |
|----------------|-------------|--------------------------------------------------------------------------------------------------------------|---------------------|
| Main results   | <u>#16b</u> | Report category boundaries when continuous variables were categorized                                        | 13, 14<br>Table 1-3 |
| Main results   | <u>#16c</u> | If relevant, consider translating estimates of relative risk into absolute risk for a meaningful time period | n/a                 |
| Other analyses | <u>#17</u>  | Report other analyses done—e.g., analyses of subgroups and interactions, and sensitivity analyses            | 17, 18              |

### **Discussion**

|                  |            |                                                                                                                                                                  |        |
|------------------|------------|------------------------------------------------------------------------------------------------------------------------------------------------------------------|--------|
| Key results      | <u>#18</u> | Summaries key results with reference to study objectives                                                                                                         | 19     |
| Limitations      | <u>#19</u> | Discuss limitations of the study, taking into account sources of potential bias or imprecision. Discuss both direction and magnitude of any potential bias.      | 23, 24 |
| Interpretation   | <u>#20</u> | Give a cautious overall interpretation considering objectives, limitations, multiplicity of analyses, results from similar studies, and other relevant evidence. | 19-24  |
| Generalizability | <u>#21</u> | Discuss the generalizability (external validity) of the study results                                                                                            | 23, 24 |

### **Other Information**

|         |            |                                                                                                                                                               |      |
|---------|------------|---------------------------------------------------------------------------------------------------------------------------------------------------------------|------|
| Funding | <u>#22</u> | Give the source of funding and the role of the funders for the present study and, if applicable, for the original study on which the present article is based | 3, 4 |
|---------|------------|---------------------------------------------------------------------------------------------------------------------------------------------------------------|------|

This checklist can be completed online using <https://www.goodreports.org/>, a tool made by the EQUATOR Network in collaboration with [Penelope.ai](http://Penelope.ai)

Supplemental Table 2. Operational definitions of evidence-based and supportive ICU care

| Variables                     | Operational definition                                                                                                                                                                                                                                                                                                                                                                                                                                                                                                                                                                                                    | Variable type                                             |
|-------------------------------|---------------------------------------------------------------------------------------------------------------------------------------------------------------------------------------------------------------------------------------------------------------------------------------------------------------------------------------------------------------------------------------------------------------------------------------------------------------------------------------------------------------------------------------------------------------------------------------------------------------------------|-----------------------------------------------------------|
| Elements of the ABCDEF bundle |                                                                                                                                                                                                                                                                                                                                                                                                                                                                                                                                                                                                                           |                                                           |
| Element A                     | Regular <b>Pain</b> assessment that medical staff assesses all patients with COVID-19 6 times or more per day by using a pain assessment tool such as the Numerical Rating Scale (NRS), Critical-care Pain Observation Tool (CPOT), Behavioral Pain Scale (BPS), and others                                                                                                                                                                                                                                                                                                                                               | Dichotomous variable (Yes / No)                           |
| Element B                     | Both <b>Spontaneous Awakening Trials</b> and <b>Spontaneous Breathing Trials</b> assessment. Regular <b>Spontaneous Awakening Trials</b> assessment means that medical staff orders cessation of sedatives and narcotics, or a similar local protocol, for all patients with COVID-19 using continuous or intermittent sedation to evaluate consciousness. Regular <b>Spontaneous Breathing Trials</b> assessment means that medical staff sets a respiratory rate of zero with 8 cm or less of pressure support ventilation, or similar local protocol, to evaluate whether a patient meets requirements for extubation. | Dichotomous variable (Yes / No)                           |
| Element C                     | Regular <b>Sedation</b> assessment that medical staff assesses all patients with COVID-19 6 times or more per day by using assessment tools such as the Richmond Agitation- Sedation Scale.                                                                                                                                                                                                                                                                                                                                                                                                                               | Dichotomous variable (Yes / No)                           |
| Element D                     | Regular <b>Delirium</b> assessment means that medical staff assesses all patients with COVID-19 2 times or more per day by using assessment tools such as the Confusion Assessment Method for ICU.                                                                                                                                                                                                                                                                                                                                                                                                                        | Dichotomous variable (Yes / No)                           |
| Element E                     | <b>Mobility activities</b> higher than active mobilization level, such as <b>dangling at edge of bed</b> , standing at side of bed, marching in place, ambulating in the ICU. ( A score of 4 or higher according to the Intensive Care Unit Mobility Scale are defined as implementation of element E)                                                                                                                                                                                                                                                                                                                    | Numeric variable (the Intensive Care Unit Mobility Scale) |

|           |                                                                                                                                                                                                                                                 |                                    |
|-----------|-------------------------------------------------------------------------------------------------------------------------------------------------------------------------------------------------------------------------------------------------|------------------------------------|
| Element F | <b>Family engagement and empowerment</b> that a family member/significant other was educated regarding the ABCDEF bundle and/or participated in at least one of the following: rounds; conference; plan of care; or ABCDEF bundle related care. | Dichotomous variable<br>(Yes / No) |
|-----------|-------------------------------------------------------------------------------------------------------------------------------------------------------------------------------------------------------------------------------------------------|------------------------------------|

|                |  |  |
|----------------|--|--|
| Other ICU care |  |  |
|----------------|--|--|

|                                           |                                                                                                                                                      |                                    |
|-------------------------------------------|------------------------------------------------------------------------------------------------------------------------------------------------------|------------------------------------|
| Nutrition: Total estimated energy (kcal)  | Total estimated nutritional energy (kcal) means the total energy provided to patients within the last 24 hours, from 12 a.m. on June 3 and July 1.   | Categorical variable               |
| Nutrition: Total estimated protein (g/kg) | Total estimated nutritional protein (g/kg) means the total protein provided to patients within the last 24 hours, from 12 a.m. on June 3 and July 1. | Categorical variable               |
| ICU diary                                 | An ICU diary is written for a patient by family and staff in everyday language                                                                       | Dichotomous variable<br>(Yes / No) |
| Physical restraint                        | If the patient was physically restrained in bed at any time of the survey date, you should select “yes”                                              | Dichotomous variable<br>(Yes / No) |

ICU = intensive care unit

Supplemental Table 3. Countries with participating sites

| Country              | ICUs participating in the first survey (n=166) | ICUs participating in the second survey (n=212) |
|----------------------|------------------------------------------------|-------------------------------------------------|
| <b>Africa</b>        | <b>4 (2%)</b>                                  | <b>12 (6%)</b>                                  |
| Egypt                | 1                                              | 4                                               |
| Libya                | 2                                              | 5                                               |
| Nigeria              |                                                | 1                                               |
| Rwanda               |                                                | 1                                               |
| Sudan                | 1                                              | 1                                               |
| <b>Asia</b>          | <b>130 (78%)</b>                               | <b>155 (73%)</b>                                |
| Afghanistan          | 1                                              | 1                                               |
| India                | 7                                              | 15                                              |
| Indonesia            | 2                                              | 3                                               |
| Iran                 | 1                                              | 1                                               |
| Iraq                 |                                                | 2                                               |
| Japan                | 107                                            | 114                                             |
| Korea                | 2                                              | 2                                               |
| Philippines          | 3                                              | 4                                               |
| Saudi Arabia         | 2                                              | 5                                               |
| Singapore            | 4                                              | 5                                               |
| Thailand             |                                                | 1                                               |
| United Arab Emirates | 1                                              | 2                                               |
| <b>Europe</b>        | <b>24 (14%)</b>                                | <b>32 (15%)</b>                                 |
| Andorra              |                                                | 1                                               |
| France               | 2                                              | 2                                               |
| Germany              | 1                                              | 1                                               |
| Greece               | 3                                              | 3                                               |
| Ireland              | 1                                              | 1                                               |
| Italy                |                                                | 1                                               |
| Lithuania            | 1                                              | 1                                               |
| Netherlands          | 2                                              | 2                                               |
| Portugal             | 4                                              | 4                                               |
| Romania              |                                                | 1                                               |
| Spain                | 4                                              | 7                                               |



|                                 |               |                |
|---------------------------------|---------------|----------------|
| Switzerland                     | 2             | 2              |
| Turkey                          | 1             | 2              |
| United Kingdom                  | 3             | 4              |
| <b>Americas</b>                 | <b>8 (5%)</b> | <b>13 (6%)</b> |
| Brazil                          | 2             | 4              |
| Columbia                        |               | 1              |
| Mexico                          | 1             | 1              |
| Peru                            | 1             | 1              |
| Uruguay                         | 1             | 1              |
| USA                             | 3             | 4              |
| Venezuela                       |               | 1              |
| <b>Total participating ICUs</b> | <b>166</b>    | <b>212</b>     |

Data are presented as number (%)

ICU = intensive care unit

Supplemental Table 4. Basic information for hospitals with participating ICUs

| Parameter                                                       | ICUs participating<br>in the first survey<br>(n=166) | ICUs participating in<br>the second survey<br>(n=212) |
|-----------------------------------------------------------------|------------------------------------------------------|-------------------------------------------------------|
| Type, n (%)                                                     |                                                      |                                                       |
| University hospital                                             | 58 (36%)                                             | 75 (35%)                                              |
| University affiliated hospital                                  | 34 (20%)                                             | 48 (23%)                                              |
| Community hospital                                              | 60 (36%)                                             | 71 (34%)                                              |
| Others                                                          | 14 (8%)                                              | 18 (8%)                                               |
| Number of (beds), n (%)                                         |                                                      |                                                       |
| $x < 200$                                                       | 10 (6%)                                              | 19 (9%)                                               |
| $200 \leq x < 400$                                              | 29 (17%)                                             | 40 (19%)                                              |
| $400 \leq x < 600$                                              | 41 (25%)                                             | 48 (23%)                                              |
| $x \geq 600$                                                    | 86 (52%)                                             | 105 (50%)                                             |
| Beds exclusively for patients with COVID-19<br>infection, n (%) |                                                      |                                                       |
| $x < 10$                                                        | 61 (37%)                                             | 71 (35%)                                              |
| $10 \leq x < 20$                                                | 34 (20%)                                             | 41 (19%)                                              |
| $x \geq 20$                                                     | 71 (43%)                                             | 100 (47%)                                             |

Data are presented as number (%)

ICU = intensive care unit

In five instances, two different ICUs in the same hospital participated in this study.

Supplemental Table 5. ICU Visiting hours/day for family members before and after the COVID-19 pandemic

| Variable                                                                                                                           | ICUs participating in the first survey (n=166) | ICUs participating in the second survey (n=212) |
|------------------------------------------------------------------------------------------------------------------------------------|------------------------------------------------|-------------------------------------------------|
| <b>ICU visiting hours/day for family members BEFORE the COVID-19 pandemic (hours)</b>                                              |                                                |                                                 |
| No visiting hours                                                                                                                  | 7 (4%)                                         | 17 (8%)                                         |
| $0 < x < 6$                                                                                                                        | <b>104 (63%)</b>                               | <b>133 (63%)</b>                                |
| $6 \leq x < 12$                                                                                                                    | 28 (17%)                                       | 34 (16%)                                        |
| $12 \leq x < 18$                                                                                                                   | 3 (2%)                                         | 3 (1%)                                          |
| $18 \leq x < 24$                                                                                                                   | 4 (2%)                                         | 4 (2%)                                          |
| No limitation on visiting hours                                                                                                    | 20 (12%)                                       | 21 (10%)                                        |
| <b>The number of visiting hours/day for patients OTHER THAN those with COVID-19 in the ICU AFTER the COVID-19 pandemic (hours)</b> |                                                |                                                 |
| No visiting hours                                                                                                                  | <b>120 (72%)</b>                               | <b>154 (73%)</b>                                |
| $0 < x < 6$                                                                                                                        | 42 (25%)                                       | 54 (25%)                                        |
| $6 \leq x < 24$                                                                                                                    | 0 (0%)                                         | 0 (0%)                                          |
| No limitation on visiting hours                                                                                                    | 4 (2%)                                         | 4 (2%)                                          |

Data are presented as number (%)

ICU = intensive care unit

Supplemental Table 6. Details of Implementing the ABCDEF bundle.

(a) **Element A:** Tools and agents used to implement element A

| Variable                                                                                      | Total patients  | Patients without mechanical ventilation or ECMO | Patients on mechanical ventilation | Patients on ECMO |
|-----------------------------------------------------------------------------------------------|-----------------|-------------------------------------------------|------------------------------------|------------------|
| <b>Tools used for routine Pain assessment among patients with implementation of element A</b> | <b>(n=118)</b>  | <b>(n=42)</b>                                   | <b>(n=75)</b>                      | <b>(n=12)</b>    |
| Numerical Rating Scale; NRS                                                                   | <b>49 (42%)</b> | <b>21 (50%)</b>                                 | <b>27 (36%)</b>                    | <b>4 (33%)</b>   |
| Critical-care Pain Observation Tool; CPOT                                                     | <b>37 (31%)</b> | 9 (21%)                                         | <b>28 (37%)</b>                    | <b>5 (42%)</b>   |
| Behavioral Pain Scale; BPS                                                                    | <b>30 (25%)</b> | 8 (19%)                                         | <b>21 (28%)</b>                    | <b>6 (50%)</b>   |
| Other <sup>a</sup>                                                                            | 13 (11%)        | 6 (14%)                                         | 5 (5%)                             | 0 (0%)           |
| Multiple use: Numerical Rating Scale and Behavioral Pain Scale                                | 7 (6%)          | 0 (%)                                           | 6 (8%)                             | 2 (17%)          |
| Multiple use: Numerical Rating Scale and Critical-care Pain Observation Tool                  | 3 (3%)          | 0 (%)                                           | 3 (4%)                             | 1 (8%)           |
| <b>Analgesic agents provided to patients who received continuous analgesia, n (%)</b>         | <b>(n=118)</b>  | <b>(n=32)</b>                                   | <b>(n=85)</b>                      | <b>(n=11)</b>    |
| Fentanyl                                                                                      | <b>67 (57%)</b> | <b>11 (34%)</b>                                 | <b>56 (66%)</b>                    | <b>6 (55%)</b>   |
| Morphine                                                                                      | 14 (12%)        | 2 (6%)                                          | 12 (14%)                           | <b>4 (36%)</b>   |
| Remifentanyl                                                                                  | 7 (6%)          | 1 (3%)                                          | 6 (7%)                             | 1 (9%)           |
| Ketamine                                                                                      | 2 (2%)          | 0 (0%)                                          | 2 (2%)                             | 0 (0%)           |
| Others                                                                                        | 29 (24%)        | 18 (56%)                                        | 11 (13%)                           | 0 (0%)           |

Data are presented as number (%), ICU = intensive care unit, ECMO = extracorporeal membrane oxygenation

<sup>a</sup>Among 13 others used, 6 were Escala de Conductas Indicadoras de Dolor (ESCID); 2 were Visual Analog Scale; 1 was Face, Legs, Activity, Cry,

Consolability (FLACC).

(b) **Element B:** Main reason why Spontaneous Awakening Trials were not performed

| Variable                                                                                    | Total patients  | The patients without mechanical ventilation and ECMO | The patients on mechanical ventilation | The patients on ECMO |
|---------------------------------------------------------------------------------------------|-----------------|------------------------------------------------------|----------------------------------------|----------------------|
| <b>Patients who did not undergo element B: Spontaneous Awakening Trials</b>                 | <b>(n=72)</b>   | <b>(n=17)</b>                                        | <b>(n=54)</b>                          | <b>(n=10)</b>        |
| Fear of self-extubation                                                                     | 2 (3%)          | 0 (0%)                                               | 2 (4%)                                 | 1 (10%)              |
| Agitation or delirium                                                                       | 1 (1%)          | 0 (0%)                                               | 1 (2%)                                 | 0 (0%)               |
| Respiratory instability                                                                     | <b>27 (38%)</b> | 2 (12%)                                              | <b>25 (46%)</b>                        | <b>6 (60%)</b>       |
| Hemodynamic instability                                                                     | 11 (15%)        | 0 (0%)                                               | 11 (20%)                               | 1 (10%)              |
| Neurological dysfunction including cerebrovascular disease, such as intracranial hemorrhage | 1 (1%)          | 0 (0%)                                               | 1 (2%)                                 | 0 (0%)               |
| Multiple organ-system dysfunction                                                           | 4 (6%)          | 0 (0%)                                               | 5 (9%)                                 | 0 (0%)               |
| Many procedures, examinations, and tests such as computed tomography scan or endoscopy      | 0 (0%)          | 0 (0%)                                               | 0 (0%)                                 | 0 (0%)               |
| No Spontaneous Awakening Trial protocol in place                                            | <b>13 (18%)</b> | <b>7 (41%)</b>                                       | 6 (11%)                                | 0 (0%)               |
| Other                                                                                       | 14 (19%)        | 8 (47%)                                              | 5 (9%)                                 | 2 (20%)              |

Data are presented as number (%)

ICU = intensive care unit, ECMO = extracorporeal membrane oxygenation

(c) **Element C:** Tools and agents used to implement element C

| Variable                                                                                                   | Total patients   | Patients without mechanical ventilation or ECMO | Patients on mechanical ventilation | Patients on ECMO |
|------------------------------------------------------------------------------------------------------------|------------------|-------------------------------------------------|------------------------------------|------------------|
| <b>Tools used for regular Sedation assessment among patients who underwent implementation of element C</b> | <b>(n=136)</b>   | <b>(n=45)</b>                                   | <b>(n=90)</b>                      | <b>(n=12)</b>    |
| Richmond Agitation- Sedation Scale; RASS                                                                   | <b>104 (75%)</b> | <b>23 (51%)</b>                                 | <b>80 (89%)</b>                    | <b>12 (100%)</b> |
| Sedation-Agitation Scale; SAS                                                                              | 9 (7%)           | 3 (7%)                                          | 6 (7%)                             | 0 (0%)           |
| Other <sup>a</sup>                                                                                         | 25 (18%)         | 20 (44%)                                        | 5 (6%)                             | 0 (0%)           |
| Multiple use: Richmond Agitation- Sedation Scale and Sedation-Agitation Scale                              | 2 (1%)           | 1 (2%)                                          | 1 (1%)                             | 0 (0%)           |
| <b>Agents provided to patients who received continuous sedation</b>                                        | <b>(n=102)</b>   | <b>(n=19)</b>                                   | <b>(n=82)</b>                      | <b>(n=10)</b>    |
| Benzodiazepine                                                                                             | <b>60 (59%)</b>  | <b>13 (68%)</b>                                 | <b>44 (54%)</b>                    | <b>5 (50%)</b>   |
| Propofol                                                                                                   | 28 (27%)         | 1 (5%)                                          | 27 (33%)                           | 5 (50%)          |
| Dexmedetomidine                                                                                            | <b>33(32%)</b>   | <b>6 (32%)</b>                                  | <b>26 (32%)</b>                    | <b>7 (70%)</b>   |
| Other                                                                                                      | 8 (7%)           | 4 (21%)                                         | 4 (5%)                             | 1 (10%)          |

Data are presented as number (%)

ICU = intensive care unit, ECMO = extracorporeal membrane oxygenation

<sup>a</sup>Among 25 others used, 5 used the Ramsay Sedation Scale.

(d) **Element D:** Tools and non-pharmacologic and pharmacologic interventions to control delirium

| Variable                                                                                                                 | Total patients  | Patients without mechanical ventilation or ECMO | Patients on mechanical ventilation | Patients on ECMO |
|--------------------------------------------------------------------------------------------------------------------------|-----------------|-------------------------------------------------|------------------------------------|------------------|
| <b>Tools used for routine <b>Delirium</b> assessment among patients who underwent implementation of <b>element D</b></b> | <b>(n=100)</b>  | <b>(n=37)</b>                                   | <b>(n=62)</b>                      | <b>(n=7)</b>     |
| Confusion Assessment Method for ICU                                                                                      | <b>78 (78%)</b> | <b>25 (68%)</b>                                 | <b>52 (84%)</b>                    | <b>7 (100%)</b>  |
| Intensive Care Delirium Screening Checklist                                                                              | 14 (14%)        | 4 (11%)                                         | 10 (16%)                           | 0 (0%)           |
| Others                                                                                                                   | 9 (9%)          | 9 (24%)                                         | 0 (0%)                             | 0 (0%)           |
| Multiple use: Confusion Assessment Method for ICU and Intensive Care Delirium Screening Checklist                        | 1 (1%)          | 1 (3%)                                          | 0 (0%)                             | 0 (0%)           |
| <b>Non-pharmacological interventions to control delirium</b>                                                             | <b>(n=167)</b>  | <b>(n=85)</b>                                   | <b>(n=81)</b>                      | <b>(n=6)</b>     |
| Orientation                                                                                                              | <b>98 (59%)</b> | <b>51 (60%)</b>                                 | <b>46 (57%)</b>                    | <b>6 (100%)</b>  |
| Maximize sleep condition                                                                                                 | <b>96 (57%)</b> | <b>51 (60%)</b>                                 | <b>48 (59%)</b>                    | <b>4 (67%)</b>   |
| Strengthen mobilization/rehabilitation (duration, frequency, or intensity)                                               | <b>72 (43%)</b> | <b>30 (35%)</b>                                 | <b>44 (54%)</b>                    | <b>4 (67%)</b>   |
| Changing the round environment                                                                                           | <b>61 (37%)</b> | <b>30 (35%)</b>                                 | <b>36 (44%)</b>                    | <b>3 (50%)</b>   |
| Support for senses (hearing aids/glasses)                                                                                | 38 (23%)        | 22 (26%)                                        | 16 (20%)                           | 1 (17%)          |
| Stop use of benzodiazepine                                                                                               | 23 (14%)        | 6 (7%)                                          | 18 (22%)                           | 1 (17%)          |
| Sunbathing                                                                                                               | 15 (9%)         | 13 (15%)                                        | 6 (7%)                             | 0 (0%)           |
| Monitor taste/smell failure due to CoV predilection to olfactory nerves                                                  | 13 (8%)         | 11 (13%)                                        | 2 (2%)                             | 0 (0%)           |
| Stop use of narcotics                                                                                                    | 10 (6%)         | 4 (5%)                                          | 7 (9%)                             | 0 (0%)           |
| Other interventions                                                                                                      | 7 (4%)          | 6 (7%)                                          | 7 (9%)                             | 0 (0%)           |



| Pharmacological interventions to control delirium | (n=52)          | (n=7)          | (n=38)          | (n=4)          |
|---------------------------------------------------|-----------------|----------------|-----------------|----------------|
| Antipsychotic agents                              | <b>41 (79%)</b> | <b>6 (86%)</b> | <b>29 (76%)</b> | <b>2 (50%)</b> |
| Other                                             | 12 (23%)        | 1 (14%)        | 10 (26%)        | 2 (50%)        |

Data in table are presented as number (%), ICU = intensive care unit, ECMO = extracorporeal membrane oxygenation; CoV = coronavirus

(e) Person delivering, devices employed, and barriers to mobilization/rehabilitation: **element E**

| Variable                                                                                                               | Total patients   | Patients without mechanical ventilation or ECMO | Patients on mechanical ventilation | Patients on ECMO |
|------------------------------------------------------------------------------------------------------------------------|------------------|-------------------------------------------------|------------------------------------|------------------|
| <b>Person delivering mobilization/rehabilitation to patients</b>                                                       | <b>(n=191)</b>   | <b>(n=92)</b>                                   | <b>(n=98)</b>                      | <b>(n=10)</b>    |
| Intensivist                                                                                                            | 39 (20%)         | 10 (11%)                                        | 19 (19%)                           | 3 (30%)          |
| Physician other than intensivists                                                                                      | 19 (10%)         | 8 (9%)                                          | 11 (11%)                           | 1 (10%)          |
| Nurse                                                                                                                  | <b>115 (60%)</b> | <b>58 (63%)</b>                                 | <b>56 (57%)</b>                    | <b>9 (90%)</b>   |
| Physiotherapist                                                                                                        | <b>108 (57%)</b> | <b>40 (44%)</b>                                 | <b>68 (69%)</b>                    | <b>5 (50%)</b>   |
| Respiratory Therapist                                                                                                  | 13 (7%)          | 6 (7%)                                          | 7 (7%)                             | 0 (0%)           |
| <b>Mobility device/devices employed</b>                                                                                | <b>(n=51)</b>    | <b>(n=35)</b>                                   | <b>(n=16)</b>                      | <b>(n=0)</b>     |
| Portable cyclergometer on the bed                                                                                      | 5 (10%)          | 1 (3%)                                          | <b>4 (25%)</b>                     | 0 (0%)           |
| Electro neuromuscular stimulation                                                                                      | 3 (6%)           | 1 (3%)                                          | 2 (13%)                            | 0 (0%)           |
| Lift-up device                                                                                                         | <b>18 (35%)</b>  | <b>11 (31%)</b>                                 | <b>7 (44%)</b>                     | 0 (0%)           |
| Tilt bed                                                                                                               | <b>18 (35%)</b>  | <b>11 (31%)</b>                                 | <b>7 (44%)</b>                     | 0 (0%)           |
| Walker                                                                                                                 | 15 (29%)         | 14 (40%)                                        | 1 (6%)                             | 0 (0%)           |
| Other                                                                                                                  | 7 (14%)          | 4 (11%)                                         | 3 (19%)                            | 0 (0%)           |
| <b>Most important barriers preventing the achievement of mobility level of sitting on the edge of the bed or more.</b> | <b>(n=138)</b>   | <b>(n=34)</b>                                   | <b>(n=104)</b>                     | <b>(n=10)</b>    |
| Consciousness factor <sup>a</sup>                                                                                      | <b>36 (26%)</b>  | 4 (12%)                                         | <b>32 (31%)</b>                    | <b>4 (40%)</b>   |
| Subjective symptoms <sup>b</sup>                                                                                       | 11 (8%)          | 7 (21%)                                         | 4 (4%)                             | 0 (0%)           |
| Respiratory factor <sup>c</sup>                                                                                        | <b>42 (30%)</b>  | <b>10 (29%)</b>                                 | <b>32 (31%)</b>                    | <b>3 (30%)</b>   |
| Circulatory factor <sup>d</sup>                                                                                        | 17 (12%)         | 2 (6%)                                          | 15 (14%)                           | 1 (10%)          |

|                                               |         |         |          |         |
|-----------------------------------------------|---------|---------|----------|---------|
| Device factor <sup>e</sup>                    | 12 (9%) | 2 (6%)  | 10 (10%) | 1 (10%) |
| Medical staff factor <sup>f</sup>             | 1 (1%)  | 0 (0%)  | 1 (1%)   | 1 (10%) |
| Factors associated with COVID-19 <sup>g</sup> | 11 (8%) | 7 (21%) | 4 (4%)   | 0 (0%)  |
| Other                                         | 8 (6%)  | 2 (6)   | 6 (6%)   | 0 (0%)  |

Data presented as number (%), ICU = intensive care unit, ECMO = extracorporeal membrane oxygenation

<sup>a</sup> Consciousness factor: existing consciousness disorder, RASS:  $\leq -3$  or  $\geq +2$ , deep sedation, delirium, etc.

<sup>b</sup> Subjective symptoms: respiratory distress, BPS or  $> 3$  or NRS  $> 5$ , fatigue, patient refusal, etc.

<sup>c</sup> Respiratory factor: SpO<sub>2</sub>:  $<90\%$ ; FIO<sub>2</sub>:  $>0.6$ ; respiratory rate:  $>30$  times/min, ventilator unsynchronized, etc.

<sup>d</sup> Circulatory factor: systolic blood pressure:  $<90$  or  $>180$  mmHg; mean blood pressure:  $<65$  or  $>110$  mmHg; heart rate:  $<50$  or  $>120$  beats/min; new arrhythmias; additional administration of vasopressors, etc.)

<sup>e</sup> Device factor: exist catheter, drain, dialysis, mechanical ventilation, or extracorporeal membrane oxygenation, etc.

<sup>f</sup> Medical staff factor: lack of staff, holidays, many examinations, poor time adjustment, etc.

<sup>g</sup> Factors associated with COVID-19: restrictions for medical staff contact with the patients, restrictions for rehabilitation, infection control, etc.

(f) Arrangement for family to meet patients with COVID-19: **element F**

| Variables                                                 | Total patients<br>(n=262) | Patients without<br>mechanical ventilation<br>or ECMO (n=137) | Patients on<br>mechanical<br>ventilation (n=124) | Patients on<br>ECMO<br>(n=12) |
|-----------------------------------------------------------|---------------------------|---------------------------------------------------------------|--------------------------------------------------|-------------------------------|
| Meeting not allowed                                       | 144 (55%)                 | 63 (46%)                                                      | 79 (64%)                                         | 10 (83%)                      |
| In person                                                 | 28 (11%)                  | 19 (14%)                                                      | 9 (7%)                                           | 0 (0%)                        |
| Electronic device (using a monitor such as phone / video) | 107 (41%)                 | 68 (50%)                                                      | 38 (31%)                                         | 2 (17%)                       |

Data in table are presented as number (%)

ICU = intensive care unit, ECMO = extracorporeal membrane oxygenation

Supplemental Table 7. Association Between the Presence of a Written Protocol and Implementation of the ABCDEF Bundle

| Element                                                                | Total patients | Specific written protocol for each element: <b>Present</b> | Specific written protocol for each element: <b>Absent</b> | <i>P</i> value   |
|------------------------------------------------------------------------|----------------|------------------------------------------------------------|-----------------------------------------------------------|------------------|
| Patients receiving element <b>A</b>                                    | 118/262 (45)   | 62/102 (61)                                                | 56/160 (35)                                               | <b>&lt;0.001</b> |
| Patients receiving element <b>B (SAT)</b>                              | 29/102 (28)    | 16/48 (33)                                                 | 13/54 (24)                                                | 0.38             |
| Patients receiving element <b>B (SBT)</b>                              | 35/124 (28)    | 17/63 (27)                                                 | 18/61 (30)                                                | 0.84             |
| Patients receiving element <b>C</b>                                    | 136/262 (52)   | 97/174 (56)                                                | 39/88 (44)                                                | 0.09             |
| Patients receiving element <b>D</b>                                    | 100/262 (38)   | 34/83 (41)                                                 | 66/179 (37)                                               | 0.59             |
| Patients receiving element <b>E</b>                                    | 93/262 (35)    | 14/81 (17)                                                 | 79/181 (44)                                               | <b>&lt;0.001</b> |
| Patients receiving element <b>F*</b>                                   | 42/262 (16)    | n/a                                                        | n/a                                                       |                  |
| Patients receiving <b>nutrition support*</b><br>(protein >1.2g/kg/day) | 105/262 (40)   | n/a                                                        | n/a                                                       |                  |

Data are presented as number (%). \*Data associated with element F and nutrition support were not obtained.

ICU = intensive care unit; SAT = spontaneous awakening trials; SBT = spontaneous breathing trials.

Supplemental Table 8. Association Between Multidisciplinary Rounds and Implementation of the ABCDEF Bundle

| Element                                                               | Total patients | Multidisciplinary rounds frequency |                      |                | P value          |
|-----------------------------------------------------------------------|----------------|------------------------------------|----------------------|----------------|------------------|
|                                                                       |                | Daily                              | At least once a week | Not applicable |                  |
| Patients receiving element <b>A</b>                                   | 118/262 (45)   | 95/224 (42)                        | 3/4 (75)             | 20/34 (59)     | 0.12             |
| Patients receiving element <b>B (SAT)</b>                             | 29/102 (28)    | 26/85 (31)                         | 0/3 (0)              | 3/14 (21)      | 0.62             |
| Patients receiving element <b>B (SBT)</b>                             | 35/124 (28)    | 27/101 (27)                        | 1/3 (33)             | 7/20 (35)      | 1.0              |
| Patients receiving element <b>C</b>                                   | 136/262 (52)   | 117/224 (52)                       | 3/4 (75)             | 16/34 (47)     | 0.74             |
| Patients receiving element <b>D</b>                                   | 100/262 (38)   | 76/224 (34)                        | 4/4 (100)            | 20/34 (59)     | <b>&lt;0.001</b> |
| Patients receiving element <b>E</b>                                   | 93/262 (35)    | 86/224 (38)                        | 0/4 (0)              | 7/34 (20)      | 0.06             |
| Patients receiving element <b>F</b>                                   | 42/262 (16)    | 37/224 (17)                        | 1/4 (25)             | 4/34 (12)      | 0.69             |
| Patients receiving <b>nutrition support (protein &gt;1.2g/kg/day)</b> | 105/262 (40)   | 92/224 (41)                        | 3/4 (75)             | 10/34 (29)     | 0.16             |

Data are presented as number (%).

SAT = spontaneous awakening trials; SBT = spontaneous breathing trials.

Supplemental Table 9. Association Between Nurse-to-Patient Ratio and Implementation of the ABCDEF Bundle

| Element                                                               | Total patients     | Nurse-to-patient ratio in the ICU |                     |                    | P value          |
|-----------------------------------------------------------------------|--------------------|-----------------------------------|---------------------|--------------------|------------------|
|                                                                       |                    | 1:1                               | 1:2                 | 1:≥3               |                  |
| Patients receiving element <b>A</b>                                   | 118/262 (45%)      | 18/45 (40%)                       | 79/161 (49%)        | 21/56 (38%)        | 0.25             |
| Patients receiving element <b>B (SAT)</b>                             | 29/102 (28%)       | 7/29 (24%)                        | 14/53 (26%)         | 8/20 (40%)         | 0.43             |
| Patients receiving element <b>B (SBT)</b>                             | 35/124 (28%)       | 8/30 (27%)                        | 19/64 (30%)         | 8/30 (27%)         | 0.93             |
| Patients receiving element <b>C</b>                                   | 136/262 (52%)      | 24/45 (53%)                       | 87/161 (54%)        | 25/56 (45%)        | 0.47             |
| Patients receiving element <b>D</b>                                   | 100/262 (38%)      | 16/45 (36%)                       | 73/161 (45%)        | 11/56 (20%)        | <b>0.03</b>      |
| Patients receiving element <b>E</b>                                   | <b>93/262 (35)</b> | <b>6/45 (13%)</b>                 | <b>72/161 (45%)</b> | <b>15/56 (27%)</b> | <b>&lt;0.001</b> |
| Patients receiving element <b>F</b>                                   | 42/262 (16%)       | 4/45 (9%)                         | 28/161 (17%)        | 10/56 (18%)        | 0.36             |
| Patients receiving <b>nutrition support (protein &gt;1.2g/kg/day)</b> | 105/262 (40%)      | 10/45 (22%)                       | 76/161 (47%)        | 19/56 (34%)        | <b>0.01</b>      |

Data are presented as number (%).

ICU = intensive care unit; SAT = spontaneous awakening trials; SBT = spontaneous breathing trials.

Supplemental Table 10. Association Between Number of ICU Beds Exclusively for COVID-19 Patients and Implementation of the ABCDEF Bundle

| Element                                                               | Total patients     | Total ICU beds exclusively for the patients with COVID-19 |                    |                    | P value          |
|-----------------------------------------------------------------------|--------------------|-----------------------------------------------------------|--------------------|--------------------|------------------|
|                                                                       |                    | <5                                                        | 5–19               | ≥20                |                  |
| Patients receiving element <b>A</b>                                   | 118/262 (45)       | 23/39 (59)                                                | 62/117 (53)        | 33/106 (31)        | <b>&lt;0.001</b> |
| Patients receiving element <b>B (SAT)</b>                             | 29/102 (28)        | 4/14 (29)                                                 | 17/54 (31)         | 8/34 (24)          | 0.72             |
| Patients receiving element <b>B (SBT)</b>                             | 35/124 (28)        | 7/24 (29)                                                 | 20/74 (27)         | 8/26 (31)          | 0.93             |
| Patients receiving element <b>C</b>                                   | 136/262 (52)       | 17/39 (44)                                                | 65/117 (56)        | 54/106 (51)        | 0.42             |
| Patients receiving element <b>D</b>                                   | 100/262 (38)       | 17/39 (44)                                                | 53/117 (45)        | 30/106 (28)        | <b>0.03</b>      |
| Patients receiving element <b>E</b>                                   | <b>93/262 (35)</b> | <b>1/39 (3)</b>                                           | <b>24/117 (21)</b> | <b>68/106 (64)</b> | <b>&lt;0.001</b> |
| Patients receiving element <b>F</b>                                   | 42/262 (16)        | 2/39 (5)                                                  | 23/117 (20)        | 17/106 (16)        | 0.10             |
| Patients receiving <b>Nutrition support (protein &gt;1.2g/kg/day)</b> | 105/262 (40)       | 16/39 (41)                                                | 35/117 (30)        | 54/106 (51)        | <b>0.01</b>      |

Data are presented as number (%).

ICU = intensive care unit; SAT = spontaneous awakening trials; SBT = spontaneous breathing trials.



Supplemental Table 11. Association between ICU structure and implementation of elements E and F.

(a) Association between involvement of physiotherapists and implementation of **element E**

| Variable                                                                       | Patients who received element E (n=93) | Patients who did not receive element E (n=169) | P value |
|--------------------------------------------------------------------------------|----------------------------------------|------------------------------------------------|---------|
| Dedicated physiotherapists in the ICU                                          | 34 (37%)                               | 94 (56%)                                       | <0.001  |
| Physiotherapists allowed to enter the room of patients with COVID-19 infection | 18 (19%)                               | 88 (52%)                                       | <0.001  |

Data presented as number (%)

ICU = intensive care unit

(b) Association between number of visiting hours/day and implementation of **element F**

| Variable                                                         | Patients who received element F (n=42) | Patients who did not receive element F (n=220) | P value |
|------------------------------------------------------------------|----------------------------------------|------------------------------------------------|---------|
| Number of visiting hours/day for a patient with COVID-19 (hours) |                                        |                                                |         |
| No visiting hours                                                | 37 (88%)                               | 201 (91%)                                      | 0.56    |
| 0 < x < 6                                                        | 5 (12%)                                | 18 (8%)                                        |         |
| 6 ≤ x < 12                                                       | 0 (0%)                                 | 0 (0%)                                         |         |
| 12 ≤ x < 18                                                      | 0 (0%)                                 | 1 (0%)                                         |         |
| 18 ≤ x < 24                                                      | 0 (0%)                                 | 0 (0%)                                         |         |
| No limit                                                         | 0 (0%)                                 | 0 (0%)                                         |         |

Data presented as number (%)

ICU = intensive care unit

Supplemental Table 12. Implementation of the ABCDE bundle in the present study compared to prior to the COVID-19 pandemic.

| Variable                                                                          | Total patients (n=262) | Reference <sup>(1)</sup> | Reference <sup>(2)</sup> |
|-----------------------------------------------------------------------------------|------------------------|--------------------------|--------------------------|
| Patients receiving element <b>A</b> , n (%)                                       | 118 (45%)              | <b>(77%)</b>             | <b>(83%)</b>             |
| Patients receiving element <b>B</b>                                               |                        |                          |                          |
| <b>Spontaneous Awakening Trial</b> during continuous sedation, n (%) <sup>a</sup> | 29 (28%)               | <b>(34%)</b>             | <b>(66%)</b>             |
| <b>Spontaneous Breathing Trial</b> on mechanical ventilation, n (%) <sup>b</sup>  | 35 (28%)               | <b>(36%)</b>             | <b>(67%)</b>             |
| Patients receiving element <b>C</b> , n (%)                                       | 136 (52%)              | <b>(59%)</b>             | <b>(89%)</b>             |
| Patients receiving element <b>D</b> , n (%)                                       | 101 (39%)              | <b>(56%)</b>             | <b>(70%)</b>             |
| Patients receiving element <b>E</b> , n (%)                                       | 93 (35%)               | <b>(29%)</b>             |                          |
| Patients receiving element <b>F</b> , n (%)                                       | 42 (16%)               | <b>(63%)</b>             | <b>(67%)</b>             |

Data presented as number (%)

ICU intensive care unit, IQR interquartile range

<sup>a</sup>Percentages are calculated by dividing by the number of sedated patients. The number of sedated patients as total, at first survey, and at second survey are 102, 59, and 63 respectively.

<sup>b</sup>Percentages are calculated by dividing by the number of ventilated patients. The number of ventilated patients as total, at first survey, and at second survey are 124, 86, and 38 respectively.

#### References

(1) Pun BT, Balas MC, Barnes-Daly MA, T et al. Caring for critically ill patients with the ABCDEF bundle: results of the ICU liberation collaborative in over 15,000 Adults. Crit Care Med. 2019;47:3-14.

(2) Morandi A, Piva S, Ely WE, et al. Worldwide ABCDEF (Assessing Pain Both Spontaneous Awakening and Breathing Trials, Choice of Drugs, Delirium monitoring/management, Early exercise/mobility, and Family Empowerment). Crit Care Med. 2017;e1111-1122.
